# Supplementary material
Source: publisher figshare collection journal article supplement (https://acs.figshare.com/ndownloader/files/5115844)
Supplement: Supplementary file 1 [file 5115844]

data_p72xas 
 
_audit_creation_method            SHELXL-97 
_audit_update_record 
; 
2003-08-11   text and data added, srw 
; 
 
_chemical_name_systematic 
; 
? 
; 
 
_chemical_name_common            ? 
_chemical_melting_point          ? 
_chemical_formula_moiety         'C15 H18 Br N O3' 
_chemical_formula_sum 
 'C15 H18 Br N O3' 
_chemical_formula_structural     ? 
_chemical_formula_weight          340.21 
 
_chemical_absolute_configuration ad 
_chemical_formula_analytical     ? 
_chemical_compound_source        ? 
 
loop_ 
 _atom_type_symbol 
 _atom_type_description 
 _atom_type_scat_dispersion_real 
 _atom_type_scat_dispersion_imag 
 _atom_type_scat_source 
 'C'  'C'   0.0033   0.0016 
 'International Tables Vol C Tables 4.2.6.8 and 6.1.1.4' 
 'H'  'H'   0.0000   0.0000 
 'International Tables Vol C Tables 4.2.6.8 and 6.1.1.4' 
 'N'  'N'   0.0061   0.0033 
 'International Tables Vol C Tables 4.2.6.8 and 6.1.1.4' 
 'O'  'O'   0.0106   0.0060 
 'International Tables Vol C Tables 4.2.6.8 and 6.1.1.4' 
 'Br'  'Br'  -0.2901   2.4595 
 'International Tables Vol C Tables 4.2.6.8 and 6.1.1.4' 
 
_symmetry_cell_setting           'Monoclinic' 
_symmetry_space_group_name_H-M   'P 21 ' 
_symmetry_space_group_name_Hall  'P 2yb ' 
 
loop_ 
 _symmetry_equiv_pos_as_xyz 
 'x, y, z' 
 '-x, y+1/2, -z' 
 
_cell_length_a                    7.623(3) 
_cell_length_b                    6.294(3) 
_cell_length_c                    15.896(6) 
_cell_angle_alpha                 90.00 
_cell_angle_beta                  100.643(7) 
_cell_angle_gamma                 90.00 
_cell_volume                      749.6(5) 
_cell_formula_units_Z             2 
_cell_measurement_temperature     193(2) 
_cell_measurement_reflns_used    714 
_cell_measurement_theta_min      2.7 
_cell_measurement_theta_max      23.0 
_exptl_crystal_description       'columnar' 
_exptl_crystal_colour            'colorless' 
_exptl_crystal_size_max          0.26 
_exptl_crystal_size_mid          0.24 
_exptl_crystal_size_min          0.12 
_exptl_crystal_density_meas      'not measured' 
_exptl_crystal_density_diffrn     1.507 
_exptl_crystal_density_method    ? 
_exptl_crystal_F_000              348 
_exptl_crystal_id                p72xas 
 
_exptl_crystal_preparation 
; 
The data crystal was mounted using oil (Parantone-N, Exxon) to a 
0.3 mm cryo-loop (Hampton Research) with the (0 1 0) scattering planes 
roughly normal to the spindle axis. 
; 
 
_exptl_absorpt_coefficient_mu     2.748 
_exptl_absorpt_correction_type   'integration' 
_exptl_absorpt_correction_T_min  0.5650 
_exptl_absorpt_correction_T_max  0.7810 
_exptl_absorpt_process_details   '(Bruker, 2001)' 
 
_exptl_special_details 
; 
 ? 
; 
 
_diffrn_ambient_temperature       193(2) 
_diffrn_radiation_wavelength      0.71073 
_diffrn_radiation_wavelength_id  p72xas 
_diffrn_radiation_type           'MoK\a' 
_diffrn_radiation_source         'normal-focus sealed tube' 
_diffrn_radiation_monochromator  'graphite' 
_diffrn_measurement_device_type   ? 
_diffrn_measurement_device       'Siemens Platform/CCD' 
_diffrn_measurement_method       'profile data from \w scans' 
 
_diffrn_detector_area_resol_mean  ? 
_diffrn_standards_number         626 
_diffrn_standards_interval_count  ? 
_diffrn_standards_interval_time  289 
 
_diffrn_standards_decay_%        1.9 
_diffrn_reflns_number            5915 
 
_diffrn_reflns_av_R_equivalents   0.0401 
_diffrn_reflns_av_sigmaI/netI     0.0672 
_diffrn_reflns_limit_h_min        -9 
_diffrn_reflns_limit_h_max        9 
_diffrn_reflns_limit_k_min        -7 
_diffrn_reflns_limit_k_max        7 
_diffrn_reflns_limit_l_min        -17 
_diffrn_reflns_limit_l_max        18 
_diffrn_reflns_theta_min          2.61 
_diffrn_reflns_theta_max          25.42 
_reflns_number_total              2370 
_reflns_number_gt                 1940 
_reflns_threshold_expression      >2sigma(I) 
 
_computing_data_collection       'SMART V5.625 (Bruker, 2001)' 
_computing_cell_refinement       'SAINT V6.22 (Bruker, 2001)' 
_computing_data_reduction        'SAINT V6.22 (Bruker, 2001)' 
_computing_structure_solution    'SHELXTL V6.10 (Bruker, 2001)' 
_computing_structure_refinement  'SHELXTL V6.10 (Bruker, 2001)' 
_computing_molecular_graphics    'SHELXTL V6.10 (Bruker, 2001)' 
_computing_publication_material  'CIFTAB (Sheldrick, 2001)' 
 
_refine_special_details 
; 
? 
; 
 
_refine_ls_structure_factor_coef  Fsqd 
_refine_ls_matrix_type            full 
_refine_ls_weighting_scheme       calc 
_refine_ls_weighting_details 
 'calc w=1/[\s^2^(Fo^2^)+(0.0428P)^2^+0.0000P] where P=(Fo^2^+2Fc^2^)/3' 
_atom_sites_solution_primary      direct 
_atom_sites_solution_secondary    difmap 
_atom_sites_solution_hydrogens    geom 
_refine_ls_hydrogen_treatment    noref 
_refine_ls_extinction_method      none 
_refine_ls_extinction_coef        ? 
_refine_ls_abs_structure_details 
 'Flack H D (1983), Acta Cryst. A39, 876-881' 
_refine_ls_abs_structure_Flack    0.016(14) 
_refine_ls_number_reflns          2370 
_refine_ls_number_parameters      182 
_refine_ls_number_restraints      1 
_refine_ls_R_factor_all           0.0601 
_refine_ls_R_factor_gt            0.0436 
_refine_ls_wR_factor_ref          0.0985 
_refine_ls_wR_factor_gt           0.0920 
_refine_ls_goodness_of_fit_ref    1.042 
_refine_ls_restrained_S_all       1.042 
_refine_ls_shift/su_max           0.000 
_refine_ls_shift/su_mean          0.000 
 
loop_ 
 _atom_site_label 
 _atom_site_type_symbol 
 _atom_site_fract_x 
 _atom_site_fract_y 
 _atom_site_fract_z 
 _atom_site_U_iso_or_equiv 
 _atom_site_adp_type 
 _atom_site_occupancy 
 _atom_site_symmetry_multiplicity 
 _atom_site_calc_flag 
 _atom_site_refinement_flags 
 _atom_site_disorder_assembly 
 _atom_site_disorder_group 
Br1 Br 0.79086(7) 0.57526(12) -0.12911(3) 0.0564(2) Uani 1 1 d . . . 
C1 C 0.6731(6) 0.6477(7) 0.3839(3) 0.0300(11) Uani 1 1 d . . . 
H1 H 0.6282 0.7927 0.3945 0.036 Uiso 1 1 calc R . . 
C2 C 0.8749(6) 0.6558(7) 0.3948(3) 0.0332(12) Uani 1 1 d . . . 
H2 H 0.9219 0.5071 0.3975 0.040 Uiso 1 1 calc R . . 
C3 C 0.9092(6) 0.7614(7) 0.3104(3) 0.0277(10) Uani 1 1 d . . . 
H3 H 0.9996 0.6768 0.2865 0.033 Uiso 1 1 calc R . . 
C4 C 0.7288(5) 0.7585(7) 0.2468(3) 0.0284(10) Uani 1 1 d . . . 
H4 H 0.6719 0.9010 0.2488 0.034 Uiso 1 1 calc R . . 
C5 C 0.6199(5) 0.5970(10) 0.2884(2) 0.0298(10) Uani 1 1 d . . . 
H5 H 0.6650 0.4516 0.2786 0.036 Uiso 1 1 calc R . . 
C6 C 0.4181(5) 0.5968(10) 0.2591(3) 0.0342(10) Uani 1 1 d . . . 
H6A H 0.3875 0.5562 0.1980 0.041 Uiso 1 1 calc R . . 
H6B H 0.3697 0.7406 0.2657 0.041 Uiso 1 1 calc R . . 
C7 C 0.3378(6) 0.4380(8) 0.3136(3) 0.0373(12) Uani 1 1 d . . . 
H7A H 0.2062 0.4402 0.2965 0.045 Uiso 1 1 calc R . . 
H7B H 0.3796 0.2934 0.3027 0.045 Uiso 1 1 calc R . . 
C8 C 0.3881(6) 0.4864(8) 0.4087(3) 0.0401(12) Uani 1 1 d . . . 
H8A H 0.3348 0.3781 0.4415 0.048 Uiso 1 1 calc R . . 
H8B H 0.3394 0.6268 0.4205 0.048 Uiso 1 1 calc R . . 
C9 C 0.5917(6) 0.4873(8) 0.4380(3) 0.0368(12) Uani 1 1 d . . . 
H9A H 0.6223 0.5268 0.4993 0.044 Uiso 1 1 calc R . . 
H9B H 0.6403 0.3438 0.4311 0.044 Uiso 1 1 calc R . . 
C10 C 0.7447(6) 0.7150(8) 0.1555(3) 0.0283(11) Uani 1 1 d . . . 
C11 C 0.6798(6) 0.8561(8) 0.0904(3) 0.0385(12) Uani 1 1 d . . . 
H11 H 0.6254 0.9839 0.1044 0.046 Uiso 1 1 calc R . . 
C12 C 0.6911(7) 0.8185(9) 0.0066(3) 0.0445(13) Uani 1 1 d . . . 
H12 H 0.6458 0.9186 -0.0367 0.053 Uiso 1 1 calc R . . 
C13 C 0.7700(6) 0.6315(9) -0.0136(3) 0.0403(16) Uani 1 1 d . . . 
C14 C 0.8360(7) 0.4876(9) 0.0483(3) 0.0451(13) Uani 1 1 d . . . 
H14 H 0.8915 0.3611 0.0338 0.054 Uiso 1 1 calc R . . 
C15 C 0.8213(6) 0.5274(7) 0.1333(3) 0.0378(13) Uani 1 1 d . . . 
H15 H 0.8641 0.4254 0.1763 0.045 Uiso 1 1 calc R . . 
N1 N 0.9779(6) 0.9827(7) 0.3304(3) 0.0436(11) Uani 1 1 d . . . 
O1 O 0.9617(5) 0.7679(6) 0.4682(2) 0.0485(10) Uani 1 1 d . . . 
H1A H 1.0298 0.6850 0.5004 0.073 Uiso 1 1 calc R . . 
O2 O 1.1379(5) 1.0106(6) 0.3369(3) 0.0683(13) Uani 1 1 d . . . 
O3 O 0.8740(6) 1.1183(6) 0.3443(3) 0.0741(14) Uani 1 1 d . . . 
 
loop_ 
 _atom_site_aniso_label 
 _atom_site_aniso_U_11 
 _atom_site_aniso_U_22 
 _atom_site_aniso_U_33 
 _atom_site_aniso_U_23 
 _atom_site_aniso_U_13 
 _atom_site_aniso_U_12 
Br1 0.0701(4) 0.0698(4) 0.0316(3) -0.0104(4) 0.0150(2) -0.0128(4) 
C1 0.034(2) 0.028(3) 0.028(3) 0.0016(18) 0.005(2) -0.0016(18) 
C2 0.045(3) 0.023(3) 0.030(3) 0.0017(19) 0.004(2) -0.0019(19) 
C3 0.034(2) 0.020(2) 0.030(3) -0.007(2) 0.009(2) -0.0028(19) 
C4 0.030(2) 0.021(2) 0.035(3) 0.004(2) 0.008(2) 0.0034(19) 
C5 0.035(2) 0.024(3) 0.031(2) 0.002(3) 0.0094(17) -0.001(3) 
C6 0.035(2) 0.032(3) 0.036(2) 0.002(3) 0.0063(18) -0.001(3) 
C7 0.033(3) 0.036(3) 0.043(3) 0.004(2) 0.006(2) -0.007(2) 
C8 0.043(3) 0.036(3) 0.046(3) 0.006(2) 0.021(2) -0.008(2) 
C9 0.051(3) 0.031(3) 0.030(3) 0.002(2) 0.012(2) -0.003(2) 
C10 0.030(2) 0.027(3) 0.028(3) 0.002(2) 0.0053(19) 0.0001(19) 
C11 0.046(3) 0.035(3) 0.036(3) 0.004(2) 0.011(2) 0.007(2) 
C12 0.062(3) 0.042(3) 0.031(3) 0.006(2) 0.012(3) 0.005(3) 
C13 0.037(3) 0.056(5) 0.027(3) -0.005(2) 0.004(2) -0.010(2) 
C14 0.049(3) 0.040(3) 0.048(3) -0.006(3) 0.012(3) 0.005(2) 
C15 0.055(3) 0.028(4) 0.030(3) -0.002(2) 0.006(2) 0.010(2) 
N1 0.056(3) 0.028(3) 0.046(3) -0.0011(19) 0.007(2) -0.006(2) 
O1 0.056(2) 0.060(3) 0.026(2) 0.0013(18) -0.0015(16) -0.016(2) 
O2 0.064(3) 0.060(3) 0.083(3) -0.009(2) 0.021(2) -0.034(2) 
O3 0.081(3) 0.025(3) 0.107(4) -0.017(2) -0.009(3) 0.005(2) 
 
_geom_special_details 
; 
 All esds (except the esd in the dihedral angle between two l.s. planes) 
 are estimated using the full covariance matrix.  The cell esds are taken 
 into account individually in the estimation of esds in distances, angles 
 and torsion angles; correlations between esds in cell parameters are only 
 used when they are defined by crystal symmetry.  An approximate (isotropic) 
 treatment of cell esds is used for estimating esds involving l.s. planes. 
; 
 
loop_ 
 _geom_bond_atom_site_label_1 
 _geom_bond_atom_site_label_2 
 _geom_bond_distance 
 _geom_bond_site_symmetry_2 
 _geom_bond_publ_flag 
Br1 C13 1.905(5) . ? 
C1 C2 1.517(7) . ? 
C1 C9 1.530(6) . ? 
C1 C5 1.531(6) . ? 
C1 H1 1.0000 . ? 
C2 O1 1.419(6) . ? 
C2 C3 1.562(6) . ? 
C2 H2 1.0000 . ? 
C3 N1 1.502(6) . ? 
C3 C4 1.549(6) . ? 
C3 H3 1.0000 . ? 
C4 C10 1.503(7) . ? 
C4 C5 1.537(6) . ? 
C4 H4 1.0000 . ? 
C5 C6 1.522(5) . ? 
C5 H5 1.0000 . ? 
C6 C7 1.524(7) . ? 
C6 H6A 0.9900 . ? 
C6 H6B 0.9900 . ? 
C7 C8 1.519(7) . ? 
C7 H7A 0.9900 . ? 
C7 H7B 0.9900 . ? 
C8 C9 1.536(6) . ? 
C8 H8A 0.9900 . ? 
C8 H8B 0.9900 . ? 
C9 H9A 0.9900 . ? 
C9 H9B 0.9900 . ? 
C10 C11 1.383(7) . ? 
C10 C15 1.391(6) . ? 
C11 C12 1.371(7) . ? 
C11 H11 0.9500 . ? 
C12 C13 1.386(8) . ? 
C12 H12 0.9500 . ? 
C13 C14 1.363(7) . ? 
C14 C15 1.400(7) . ? 
C14 H14 0.9500 . ? 
C15 H15 0.9500 . ? 
N1 O3 1.212(5) . ? 
N1 O2 1.218(5) . ? 
O1 H1A 0.8400 . ? 
 
loop_ 
 _geom_angle_atom_site_label_1 
 _geom_angle_atom_site_label_2 
 _geom_angle_atom_site_label_3 
 _geom_angle 
 _geom_angle_site_symmetry_1 
 _geom_angle_site_symmetry_3 
 _geom_angle_publ_flag 
C2 C1 C9 117.8(4) . . ? 
C2 C1 C5 101.4(3) . . ? 
C9 C1 C5 111.1(4) . . ? 
C2 C1 H1 108.7 . . ? 
C9 C1 H1 108.7 . . ? 
C5 C1 H1 108.7 . . ? 
O1 C2 C1 114.8(4) . . ? 
O1 C2 C3 111.6(4) . . ? 
C1 C2 C3 104.1(3) . . ? 
O1 C2 H2 108.7 . . ? 
C1 C2 H2 108.7 . . ? 
C3 C2 H2 108.7 . . ? 
N1 C3 C4 112.5(4) . . ? 
N1 C3 C2 108.7(4) . . ? 
C4 C3 C2 106.7(3) . . ? 
N1 C3 H3 109.7 . . ? 
C4 C3 H3 109.7 . . ? 
C2 C3 H3 109.7 . . ? 
C10 C4 C5 116.2(4) . . ? 
C10 C4 C3 114.4(3) . . ? 
C5 C4 C3 102.2(3) . . ? 
C10 C4 H4 107.9 . . ? 
C5 C4 H4 107.9 . . ? 
C3 C4 H4 107.9 . . ? 
C6 C5 C1 111.8(3) . . ? 
C6 C5 C4 117.7(4) . . ? 
C1 C5 C4 102.9(4) . . ? 
C6 C5 H5 108.0 . . ? 
C1 C5 H5 108.0 . . ? 
C4 C5 H5 108.0 . . ? 
C5 C6 C7 108.4(4) . . ? 
C5 C6 H6A 110.0 . . ? 
C7 C6 H6A 110.0 . . ? 
C5 C6 H6B 110.0 . . ? 
C7 C6 H6B 110.0 . . ? 
H6A C6 H6B 108.4 . . ? 
C8 C7 C6 112.4(4) . . ? 
C8 C7 H7A 109.1 . . ? 
C6 C7 H7A 109.1 . . ? 
C8 C7 H7B 109.1 . . ? 
C6 C7 H7B 109.1 . . ? 
H7A C7 H7B 107.9 . . ? 
C7 C8 C9 111.0(4) . . ? 
C7 C8 H8A 109.4 . . ? 
C9 C8 H8A 109.4 . . ? 
C7 C8 H8B 109.4 . . ? 
C9 C8 H8B 109.4 . . ? 
H8A C8 H8B 108.0 . . ? 
C1 C9 C8 108.9(4) . . ? 
C1 C9 H9A 109.9 . . ? 
C8 C9 H9A 109.9 . . ? 
C1 C9 H9B 109.9 . . ? 
C8 C9 H9B 109.9 . . ? 
H9A C9 H9B 108.3 . . ? 
C11 C10 C15 117.7(5) . . ? 
C11 C10 C4 121.6(4) . . ? 
C15 C10 C4 120.7(4) . . ? 
C12 C11 C10 122.5(5) . . ? 
C12 C11 H11 118.7 . . ? 
C10 C11 H11 118.7 . . ? 
C11 C12 C13 118.6(5) . . ? 
C11 C12 H12 120.7 . . ? 
C13 C12 H12 120.7 . . ? 
C14 C13 C12 121.0(5) . . ? 
C14 C13 Br1 119.1(4) . . ? 
C12 C13 Br1 119.9(4) . . ? 
C13 C14 C15 119.6(5) . . ? 
C13 C14 H14 120.2 . . ? 
C15 C14 H14 120.2 . . ? 
C10 C15 C14 120.5(5) . . ? 
C10 C15 H15 119.7 . . ? 
C14 C15 H15 119.7 . . ? 
O3 N1 O2 124.1(4) . . ? 
O3 N1 C3 118.5(4) . . ? 
O2 N1 C3 117.2(4) . . ? 
C2 O1 H1A 109.5 . . ? 
 
loop_ 
 _geom_torsion_atom_site_label_1 
 _geom_torsion_atom_site_label_2 
 _geom_torsion_atom_site_label_3 
 _geom_torsion_atom_site_label_4 
 _geom_torsion 
 _geom_torsion_site_symmetry_1 
 _geom_torsion_site_symmetry_2 
 _geom_torsion_site_symmetry_3 
 _geom_torsion_site_symmetry_4 
 _geom_torsion_publ_flag 
C9 C1 C2 O1 -79.0(5) . . . . ? 
C5 C1 C2 O1 159.7(4) . . . . ? 
C9 C1 C2 C3 158.7(4) . . . . ? 
C5 C1 C2 C3 37.4(4) . . . . ? 
O1 C2 C3 N1 -16.4(5) . . . . ? 
C1 C2 C3 N1 108.0(4) . . . . ? 
O1 C2 C3 C4 -137.8(4) . . . . ? 
C1 C2 C3 C4 -13.5(4) . . . . ? 
N1 C3 C4 C10 98.8(5) . . . . ? 
C2 C3 C4 C10 -142.2(4) . . . . ? 
N1 C3 C4 C5 -134.8(4) . . . . ? 
C2 C3 C4 C5 -15.8(4) . . . . ? 
C2 C1 C5 C6 -175.6(4) . . . . ? 
C9 C1 C5 C6 58.4(6) . . . . ? 
C2 C1 C5 C4 -48.4(4) . . . . ? 
C9 C1 C5 C4 -174.3(3) . . . . ? 
C10 C4 C5 C6 -72.1(6) . . . . ? 
C3 C4 C5 C6 162.6(4) . . . . ? 
C10 C4 C5 C1 164.5(4) . . . . ? 
C3 C4 C5 C1 39.2(4) . . . . ? 
C1 C5 C6 C7 -56.7(6) . . . . ? 
C4 C5 C6 C7 -175.5(4) . . . . ? 
C5 C6 C7 C8 56.9(6) . . . . ? 
C6 C7 C8 C9 -58.2(6) . . . . ? 
C2 C1 C9 C8 -172.8(4) . . . . ? 
C5 C1 C9 C8 -56.6(5) . . . . ? 
C7 C8 C9 C1 56.4(5) . . . . ? 
C5 C4 C10 C11 118.8(5) . . . . ? 
C3 C4 C10 C11 -122.4(5) . . . . ? 
C5 C4 C10 C15 -59.5(6) . . . . ? 
C3 C4 C10 C15 59.3(6) . . . . ? 
C15 C10 C11 C12 -1.0(7) . . . . ? 
C4 C10 C11 C12 -179.3(4) . . . . ? 
C10 C11 C12 C13 0.3(8) . . . . ? 
C11 C12 C13 C14 -0.3(7) . . . . ? 
C11 C12 C13 Br1 -179.2(4) . . . . ? 
C12 C13 C14 C15 1.1(7) . . . . ? 
Br1 C13 C14 C15 180.0(4) . . . . ? 
C11 C10 C15 C14 1.7(7) . . . . ? 
C4 C10 C15 C14 -179.9(4) . . . . ? 
C13 C14 C15 C10 -1.8(7) . . . . ? 
C4 C3 N1 O3 43.8(6) . . . . ? 
C2 C3 N1 O3 -74.1(6) . . . . ? 
C4 C3 N1 O2 -140.7(4) . . . . ? 
C2 C3 N1 O2 101.4(5) . . . . ? 
 
_diffrn_measured_fraction_theta_max    0.982 
_diffrn_reflns_theta_full              25.42 
_diffrn_measured_fraction_theta_full   0.982 
_refine_diff_density_max    0.941 
_refine_diff_density_min   -0.249 
_refine_diff_density_rms    0.082 
_publ_requested_category         CO 
 
_publ_section_references 
; 
 
Sheldrick, G.M. (2001).  SHELX-97-2.  Program for crystal structure solution 
and refinement.  Institute fur anorg chemie, G\"ottingen, Germany. 
 
Bruker AXS, Inc.  (2001).  Madison, Wisconsin, USA. 
; 
 
_publ_section_figure_captions 
; 
Figure 1.  SHELXTL (Bruker, 2000) plot showing 35% probability ellipsoids 
for non-H atoms and circles of arbitrary size for H atoms. 
; 
 
_publ_section_exptl_prep 
; 
Crystals were grown from ethylacetate/hexane.  All crystals examined had 
a broad mosaic suggesting some growth flaws in this crystalization.  Five 
frame series were filtered for statistical outliers then corrected for 
absorption by integration using SHELXTL/XPREP (Bruker, 2001) before using 
SAINT/SADABS (Bruker, 2001) to sort, merge, and scale the combined data. 
A series of identical frames was collected twice during the experiment to 
monitor decay.  No decay correction was applied. 
; 
 
_publ_section_exptl_refinement 
; 
Systematic conditions suggested the ambiguous space group.   Structure 
was solved by direct methods (Sheldrick, 2001).  H atoms were included 
as riding idealized contributors with U's assigned as 1.2 times Ueq of 
adjacent non-H atoms. The space group choice was confirmed by successful 
convergence of the full-matrix least-squares refinement on F^2^ 
(Sheldrick, 2001).  The absolute structure was clearly determined.  The 
highest peaks in the final difference Fourier map were in the vicinity 
of atom Br1; the final map had no other significant features.  A final 
analysis of variance between observed and calculated structure factors 
showed no dependence on amplitude or resolution. 
; 
 
_publ_contact_author 
; 
Peter Beak 
University of Illinois at Urbana-Champaign
Department of Chemistry, Roger Adams Laboratory 
600 South Mathews Avenue 
Urbana, Illinois  61801 
USA 
; 
_publ_contact_author_phone        '1  217 333 2805' 
_publ_contact_author_fax          '1  217 244 8068' 
_publ_contact_author_email        beak@scs.uiuc.edu 
_publ_contact_letter 
; 
Please consider this CIF submission from a publication in J. Org. Chem. 
; 
_publ_requested_journal           'J. Org. Chem.' 
_publ_requested_coeditor_name     ? 
 
_publ_section_title 
; 
 Asymmetric Lithiation-Substitution Sequences of Substituted Allyl Amines 
; 
 
_publ_section_abstract 
; 
 ? 
; 
 
_publ_section_comment 
; 
 ? 
; 
 
_publ_section_acknowledgements 
; 
We are grateful to the National Institutes of Health(GM-18874) for 
support of this work.The Materials Chemistry Laboratory at the 
Univeristy of Illinois was supported in part by Grant No. NSF 
CHE 95-03145 from the National Science Foundation. 
;  


loop_ 
 _publ_author_name 
 _publ_author_address
'Beak, Peter' 
;
University of Illinois at Urbana-Champaign
Department of Chemistry, Roger Adams Laboratory 
600 South Mathews Avenue 
Urbana, Illinois  61801 
USA 
;
'Lee, Suk Joong'
;
University of Illinois at Urbana-Champaign
Department of Chemistry, Roger Adams Laboratory 
600 South Mathews Avenue 
Urbana, Illinois  61801 
USA 
;
'Kim, Dwight D.'
;
University of Illinois at Urbana-Champaign
Department of Chemistry, Roger Adams Laboratory 
600 South Mathews Avenue 
Urbana, Illinois  61801 
USA 
;
 
loop_ 
 _exptl_crystal_face_index_h 
 _exptl_crystal_face_index_k 
 _exptl_crystal_face_index_l 
 _exptl_crystal_face_perp_dist 
   -1.00    0.00   -1.00    0.0600 
    1.00    0.00    1.00    0.0600 
   -1.00    0.00    1.00    0.0600 
    1.00    0.00   -1.00    0.0600 
    0.00    1.00   -1.00    0.1300 
    0.00   -1.00    1.00    0.1300 
    0.00    1.00    0.00    0.1300 
    0.00   -1.00    0.00    0.1300 
    0.00    0.00   -1.00    0.1200 
    0.00    0.00    1.00    0.1200 
